# Supplementary material for: Transition metal complexes bearing a 2,2-bis(3,5-dimethylpyrazol-1-yl)propionate ligand: one methyl more matters
Source: Royal Society of Chemistry journal article supplement (doi:10.1039/c1dt00022e), 2011-01-01
Supplement: c1dt00022e.pdf [file c1dt00022e.pdf]

**Transition metal complexes bearing a 2,2-bis(3,5-dimethylpyrazol-1-yl)propionate  
ligand: one methyl more matters.**

Gazi Türkoglu, Frank Heinemann, Nicolai Burzlaff

**Supporting information**

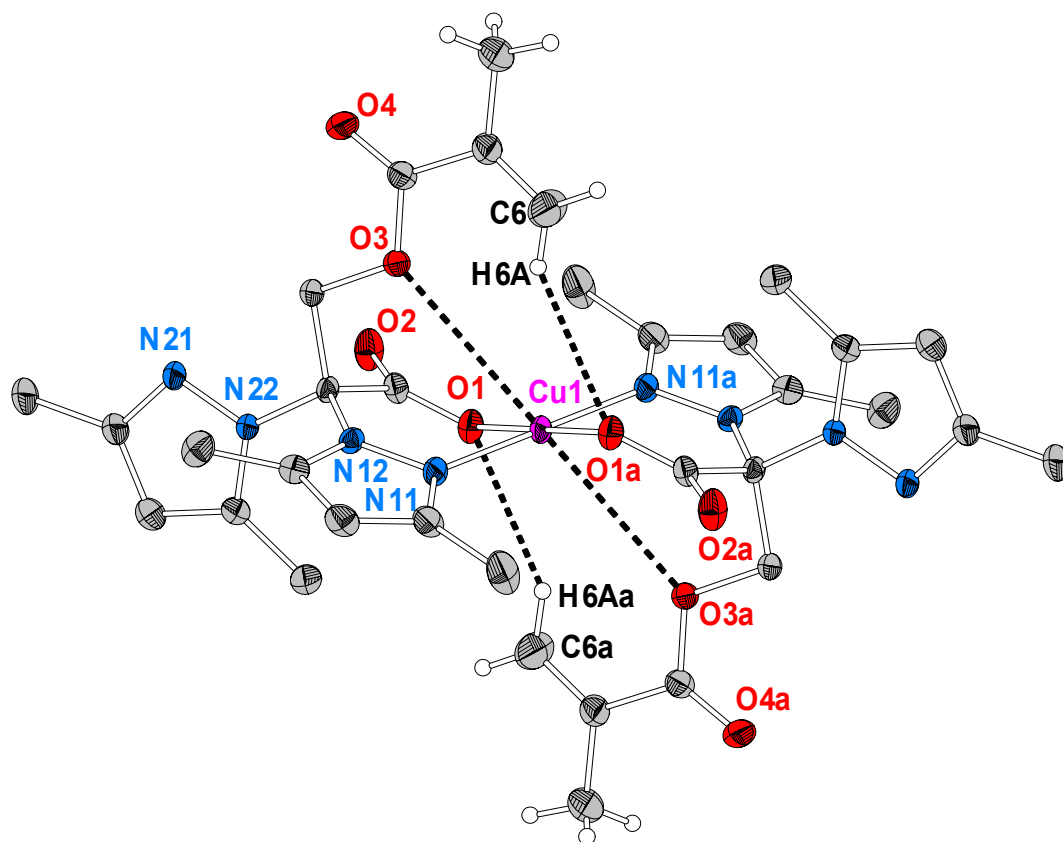

**Figure S1:** Molecular structure for the bisligand complex  $[\text{Cu}(\text{bdmpzmp})_2]$ . Thermal ellipsoids are drawn at the 50 % probability level. Most hydrogen atoms have been omitted for clarity.<sup>[7]</sup>

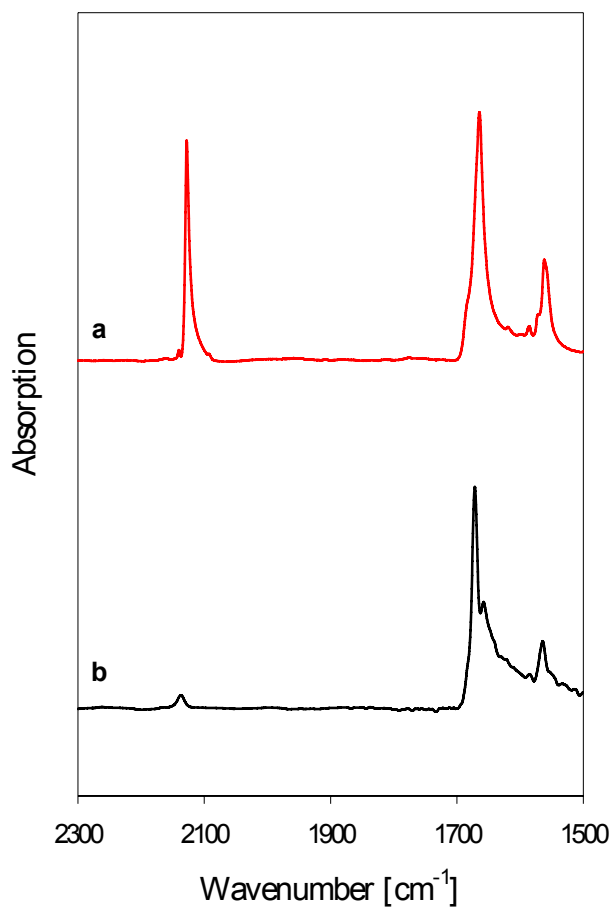

**Figure S2:** Reaction monitored by IR spectroscopy (in THF): a)  $[\text{Ru}(2,2\text{-bdmpzp})\text{Cl}(\text{PPh}_3)_2]$  (**6**) when stirred under dinitrogen atmosphere for 3 h, b) control experiment with  $[\text{Ru}(\text{bdmpza})\text{Cl}(\text{PPh}_3)_2]$ .
